# Supplementary material
Source: PubMed Central journal article supplement (PMC7035599)
Supplement: pnas.1920223117.sapp.pdf [file pnas.1920223117.sapp.pdf]

Supplementary Information for

## Measuring the Effectiveness of High-Performance Co-Optima Biofuels on Suppressing Soot Formation at High Temperatures

**Samuel Barak<sup>1</sup>, Ramees Rahman<sup>1</sup>, Sneha Neupane<sup>1</sup>, Erik Ninnemann<sup>1</sup>, Farhan Arafin<sup>1</sup>, Andrew Laich<sup>1</sup>, Anthony C. Terracciano<sup>1</sup>, and Subith Vasu<sup>1, 2</sup>**

<sup>1</sup>*Center for Advanced Turbomachinery and Energy Research (CATER), Mechanical and Aerospace Engineering Department, University of Central Florida, 4000 Central Florida Blvd, Orlando, FL 32816, USA*

<sup>2</sup>*CREOL, The College of Optics and Photonics, University of Central Florida, 4000 Central Florida Blvd, Orlando, FL 32816, USA*

Corresponding Author: Subith Vasu

Email: [subith@ucf.edu](mailto:subith@ucf.edu)

### This PDF file includes:

Supplementary text  
Figures S1 to S7  
Tables S1 to S7  
SI References

## Calibration of Soot Measurements

Obtaining soot measurements involved implementing several considerations from literature adapted to our facility (1-4). Mixtures (1) and (2) in Table 1 only contained ethylene as fuel. Experiments conducted using these mixtures ensure that our methods were valid and comparable to literature(1). Verified elements included our laser setup, experiment preparation, as well as experimental soot yields, and trends. We implemented to use an ethylene mixture standard as was done in other works with as little as possible variation (1). Our  $SY_E$  results were in-line with the results from this publication: in bell-shape, temperature range, and soot yield. We could not perform the same exact configuration as the other group because our shock tube has a larger diameter (and therefore longer pathlength). When we had attempted the same mixture, our absorbances were extremely large and useful data could not be gathered.

## Reaction Pathways to Soot

To understand the formation of soot from the different biofuels, the gas-phase reaction pathways for each was investigated using the Co-Optima mechanism. This study will also give insights to additional pathways to be considered in future efforts.

## Ethylene

Figure S1 illustrates the pathway of ethylene to benzene for mixture (2). Ethylene initially undergoes H-abstraction to form a  $C_2H_3$  radical which then undergoes radical decomposition to form acetylene ( $C_2H_2$ ). Acetylene then form the propargyl ( $C_3H_3$ ) radical which then forms benzene ( $C_6H_6$ ). The amount of benzene formed is highly dependent on total  $C_3H_3$  produced. Hence another important pathway for  $C_3H_3$  formation from  $C_2H_3$  is also shown here. With the addition of biofuels into ethylene, these pathways play an important role in PAH growth and soot formation. In Fig. S1, the species highlighted in red will contribute to more benzene and hence more PAH and soot. Species shown in green are the result of oxidation and more of these species ensures that more of fuel is oxidized.

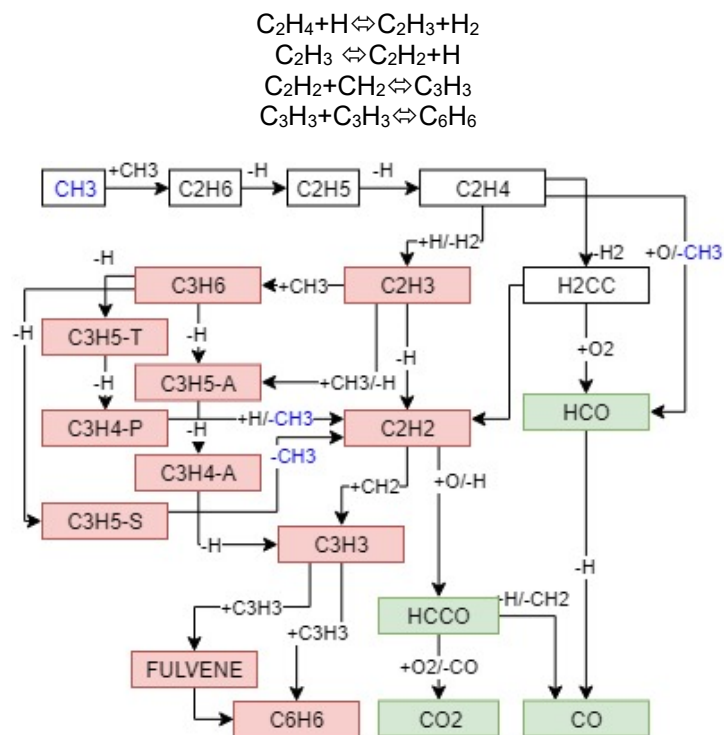

Figure S1. Pathway diagram showing ethylene at 1850 K and 4.5atm growth to benzene. Red highlights are species which act as key intermediates in formation of benzene and other polycyclic aromatic hydrocarbons. Species highlighted in green are directly related to oxidation pathway. Refer to the color version of this figure.

Ethylene also reacts with atomic oxygen to produce methyl radical (shown with blue font) which undergoes self-recombination to produce  $C_2H_6$ .  $C_2H_6$  then loses hydrogen in sequential reactions to form ethylene and then proceeds to form benzene as shown in Fig. S1. Since there are many reactions which release methyl radicals in different biofuels considered in this work, this pathway plays a significant role in formation of benzene and soot precursors.

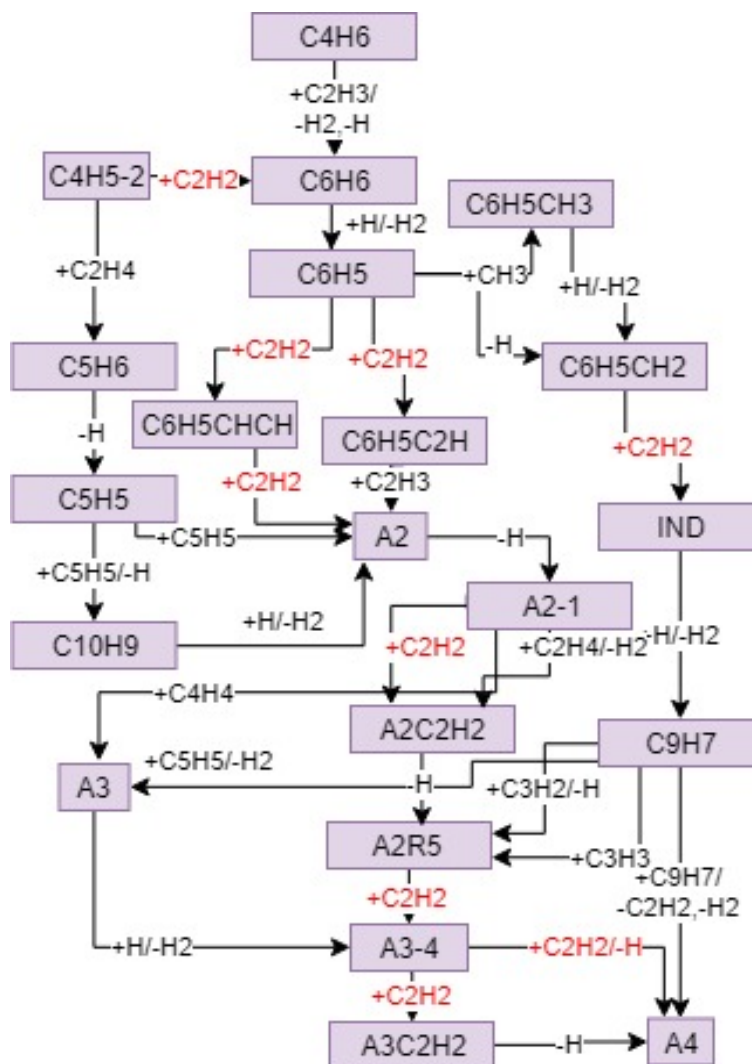

**Figure S2. Pathway diagram showing important reactions for growth of benzene ( $C_6H_6$ ) to pyrene (A4). Refer to the color version of this figure.**

As the precursor for soot is benzene formation followed by polycyclic aromatic growth, the pathway is important. The Co-Optima mechanism did not include reactions enabling pyrene formation; therefore, reactions were taken from the KM2 mechanism until pyrene. Figure S2 shows key pathways for agglomerations of benzene into pyrene (A4). This mainly takes place through the  $C_2H_2$  addition (highlighted red) following H abstraction of the parent benzene (HACA). Other dominant reactions for growth of PAHs include the reactions with  $C_3H_3$ ,  $C_4H_4$  and  $C_5H_5$ . Indenyl radical ( $C_9H_7$ ), a resonance stabilized species, also plays an important role in PAH growth enabling pyrene formation directly from a self-recombination reaction. It also forms phenanthrene (A3) via an  $C_5H_5$  addition reaction. The effect of these resonant stabilized radicals in PAH growth has been studied in many previous works (5, 6). Although Fig. S2 is for PAH formation from ethylene, the radicals and molecules contained within the reaction mechanisms will be present within the other

biofuel combustion and as a result also sheds insight to how those fuels may form PAHs and subsequently, soot.

### Methylfuran

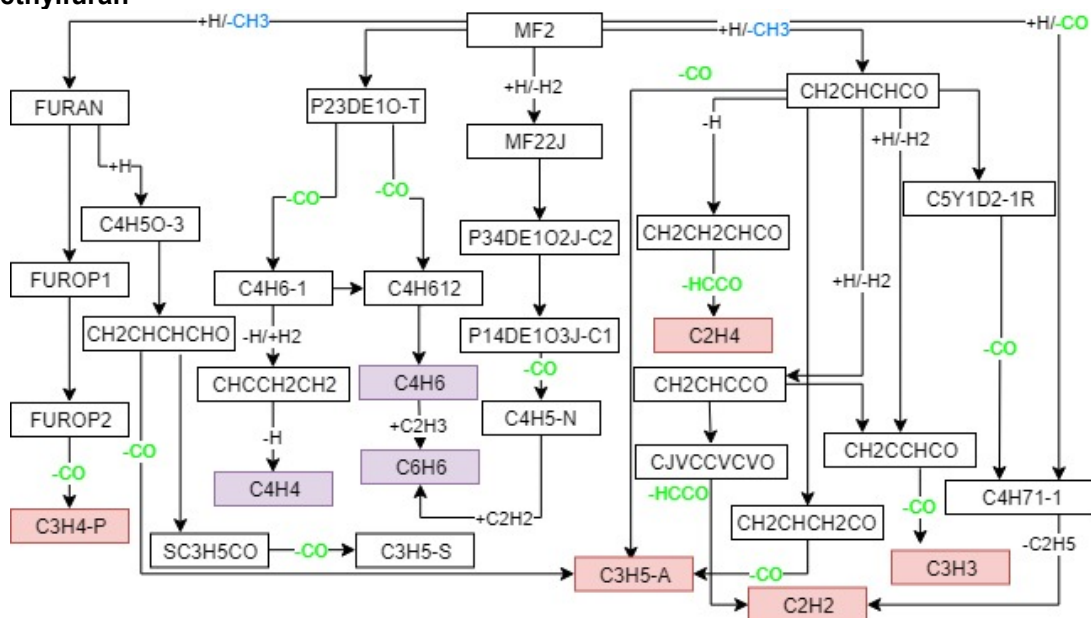

**Figure S3. Reaction pathway for methylfuran at 1850K and 4.5 atm showing dominant reactions. Refer to the color version of this figure.**

The decomposition of methyl furan initiates via a ring opening reaction forming 2,3-pentadienal (P23DE10-T). 2,3-pentadienal then forms 1-butyne and 1,2-butadiene releasing CO. 1-butyne eventually forms C<sub>4</sub>H<sub>4</sub> radical and 1,2-butadiene forms benzene both of which adds to soot formation. Methylfuran also releases a methyl radical by reaction with H atoms to form furan or 1,3-butadien-1-one which eventually forms C<sub>3</sub>H<sub>4</sub>-P, C<sub>3</sub>H<sub>5</sub>-A, C<sub>3</sub>H<sub>3</sub>, C<sub>2</sub>H<sub>4</sub> or C<sub>2</sub>H<sub>2</sub>. Each of the species formed eventually enable pathways to benzene, and subsequently more PAHs, via the previously illustrated example to form. These reaction pathways can explain the higher SY<sub>E</sub> realized in experiments shown in Fig. 6 after 2. From Fig. S3, it can also be observed that there are several pathways which enable the formation of carbon monoxide leading credibility that the O in methylfuran may readily lead to the formation of CO. This will result in a soot reduction effect for methyl furan as one carbon atom from biofuel molecule escapes as CO and does not contribute to soot growth. Explaining why less soot is observed before 2000μs in Fig. 6.

### Diisobutylene

Within Fig. S4, the reaction pathway for α-diisobutylene oxidation is presented at an equivalence ratio of 8.6. As expected, the most dominant two reactions involve unimolecular decomposition releasing either: a CH<sub>3</sub> to form 2,4-dimethylpentenyl; or dissociating into tertiary butyl radical (TC<sub>4</sub>H<sub>9</sub>) and 2-methyl propenyl radical (IC<sub>4</sub>H<sub>7</sub>). Formation of C<sub>3</sub>H<sub>5</sub>-T, C<sub>3</sub>H<sub>4</sub>-A, C<sub>3</sub>H<sub>3</sub> and CH<sub>3</sub> are likely through the former pathway; while conversely the latter forms methyl radicals and C<sub>3</sub>H<sub>6</sub>. All of these species will then follow the pathway shown in baseline case Fig. S2 to form PAHs which result in increased soot production. H abstraction pathway by H atoms also plays a significant role in diisobutylene oxidation at high equivalence ratios. These reactions as shown in Fig. S4 form more of C<sub>3</sub>H<sub>4</sub>-A and CH<sub>3</sub> radicals which contributes to PAH growth as shown in Figs. S1 and S2. Illustrated reaction pathways can explain the SY<sub>E</sub> increase over baseline found in experiments shown in Fig. 7.

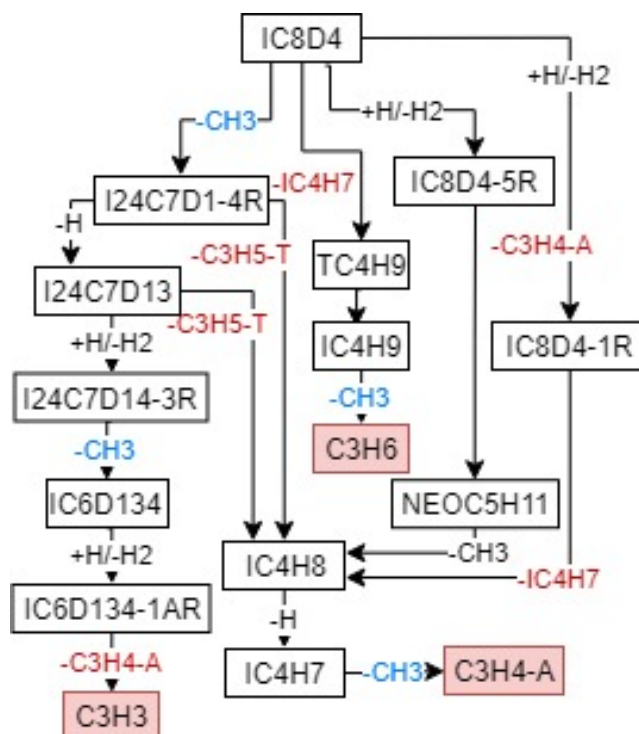

Figure S4. Reaction pathway for diisobutylene at 1850K and 4.5 atm showing dominant reactions. Refer to the color version of this figure.

### Ethanol

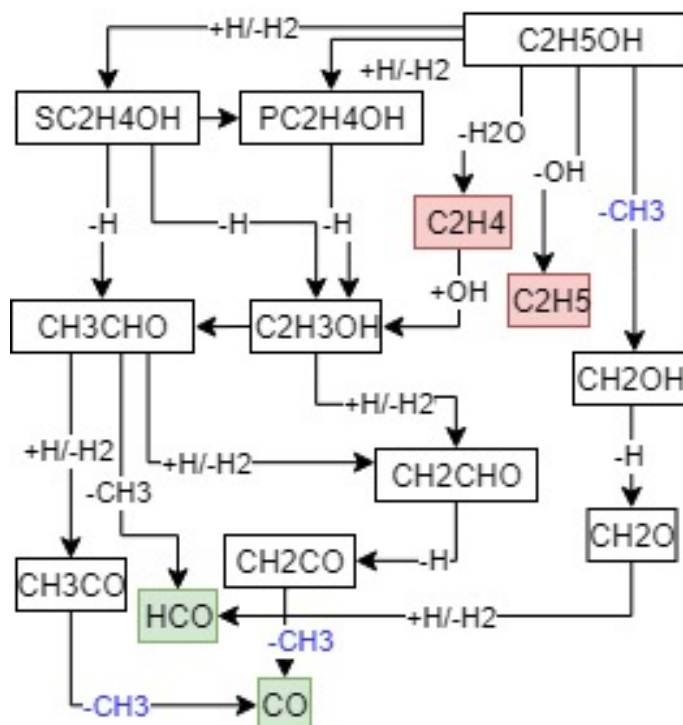

Figure S5. Reaction pathway for ethanol at 1850K and 4.5 atm showing dominant reactions. Refer to the color version of this figure.

An investigation of the major reaction pathway in ethanol blend at this rich equivalence shows that ethanol readily undergoes unimolecular decomposition into  $\text{CH}_2\text{OH}$ ,  $\text{C}_2\text{H}_5$  and  $\text{C}_2\text{H}_4$  by releasing  $\text{CH}_3$ ,  $\text{OH}$  and  $\text{H}_2\text{O}$  (Fig. S5) at high temperatures. While  $\text{C}_2\text{H}_5$  and  $\text{C}_2\text{H}_4$  follow the pathway shown in the baseline case (Fig. S1) for their growth to PAHs,  $\text{CH}_2\text{OH}$  forms  $\text{CO}$  after forming  $\text{HCO}$ . The  $\text{CH}_2\text{OH}$  reaction pathway can explain the  $\text{SY}_E$  reduction realized in experiments shown in Fig. 7. The H-abstraction pathways to  $\text{SC}_2\text{H}_4\text{OH}$  and  $\text{PC}_2\text{H}_4\text{OH}$  are relatively slow compared to the unimolecular decomposition pathways. The decomposition of ethanol to  $\text{CH}_2\text{OH}$  and  $\text{CH}_3$  creates more  $\text{CH}_3$  radicals as compared to the baseline case which react with  $\text{C}_2\text{H}_3$  (formed from ethylene in the mixture) to form  $\text{C}_3\text{H}_5\text{-A}$  and eventually  $\text{C}_3\text{H}_3$  as shown in reactions below:

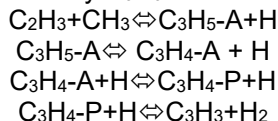

This pathway will result in more PAH and eventually adds up to soot. Hence, in the present state, the Co-Optima mechanism predicts more soot from ethanol than baseline as shown in Fig. 8. Nevertheless, the intended use of Co-Optima mechanism is not for predicting soot from combustion but to predict major combustion species and ignition delay of the biofuels.

### Cyclopentanone

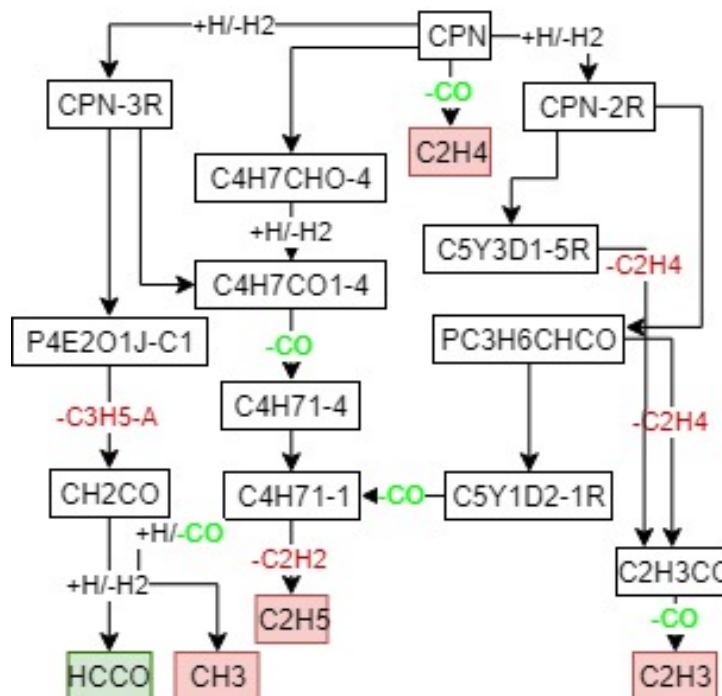

**Figure S6. Reaction pathway for cyclopentanone at 1850K and 4.5 atm. Refer to the color version of this figure.**

Figure S6 displays important pathways for cyclopentanone oxidation at high temperature and equivalence ratio of 8.6. For cyclopentanone, most dominant pathway is its decomposition into carbon monoxide and two ethylene molecules. Around 80% of initial decomposition of cyclopentanone follows this pathway. This reaction pathway can explain the  $\text{SY}_E$  reduction relative to baseline realized in experiments shown in Fig. 7 as significant amount of carbon content escapes as  $\text{CO}$ . Ethylene formed then follows the pathway shown in Fig. 10 to grow into benzene and larger PAHs. Other important pathways include H abstraction reactions to form cyclopentanone radicals CPN-3R and CPN-2R. These radical then undergoes further reactions to form  $\text{C}_3\text{H}_5\text{-A}$ ,  $\text{C}_2\text{H}_4$ ,  $\text{C}_2\text{H}_3$ ,  $\text{C}_2\text{H}_2$  and  $\text{CH}_3$  radicals in the end. All these species contribute to PAH growth and to soot formation.

## Methyl Acetate

Figure S7 shows the important reaction pathways for methyl acetate, which undergoes the following unimolecular decomposition at high temperature and equivalence ratio of 8.6:

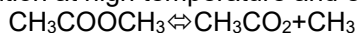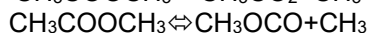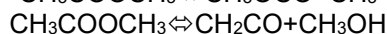

The first two reactions release methyl radicals which contributes to PAH growth as shown in Fig. S2.  $\text{CH}_2\text{CO}$  and  $\text{CH}_3\text{OH}$  formed from the third reaction undergoes further reactions to release  $\text{CH}_3$  radical and  $\text{CO}$ .  $\text{CH}_3\text{CO}_2$  and  $\text{CH}_3\text{OCO}$  then dissociates to form methyl radicals as shown below:

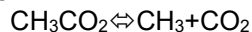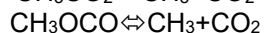

Along with methyl radical,  $\text{CO}_2$  is released showing that both oxygen atoms present in methyl acetate escapes along with one carbon atom. This reaction pathway can explain the  $\text{SY}_E$  reduction realized in experiments compared to baseline shown in Fig. 7. Methyl radicals released in several steps are the main contributors to PAH and soot formation (through pathway presented in Fig. S1) in case of methyl acetate.

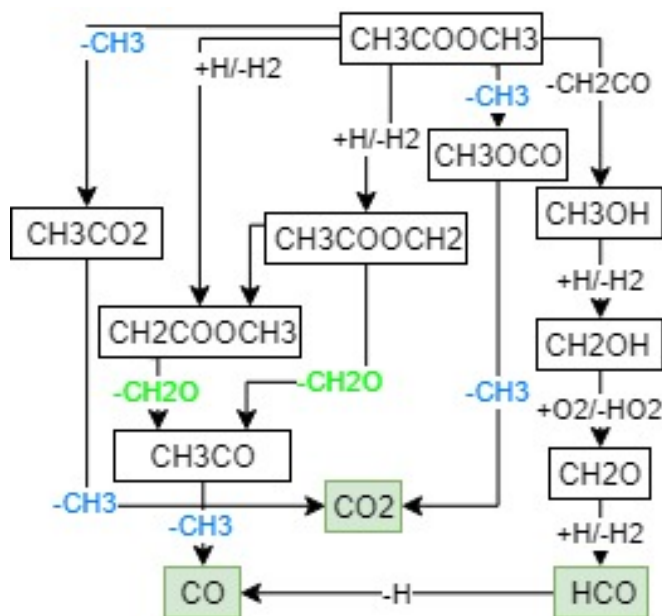

Figure S7. Reaction pathway for methyl acetate at 1850K and 4.5 atm. Refer to the colored version of this figure.



The following tables are the experimental data. With the temperatures and pressures provided, the induction time and soot yield for the mixtures are given. The uncertainty in the temperature is 2.0%, pressure is 1.8%,  $SY_E$  is 10%, and induction time is 0.5  $\mu s$ .

| Temperature (K) | Pressure (atm) | $SY_E$ | Induction Time ( $\mu s$ ) |
|-----------------|----------------|--------|----------------------------|
| 1755            | 4.47           | 0.0010 | 2222                       |
| 1772            | 4.39           | 0.0023 | 1899                       |
| 1818            | 4.45           | 0.0065 | 1499                       |
| 1846            | 4.51           | 0.0111 | 1286                       |
| 1889            | 4.11           | 0.0165 | 927                        |
| 1934            | 4.28           | 0.0205 | 556                        |
| 1951            | 4.25           | 0.0181 | 554                        |
| 2003            | 4.13           | 0.0096 | 474                        |
| 2109            | 4.11           | 0.0041 | 202                        |
| 2081            | 3.99           | 0.0033 | 153                        |
| 2180            | 4.07           | 0.0039 | 46                         |

**Table S.1: The soot yield and induction time for each experiment of mixture 1,  $\phi = 10$ .**

| Temperature (K) | Pressure (atm) | $SY_E$ | Induction Time ( $\mu s$ ) |
|-----------------|----------------|--------|----------------------------|
| 1693            | 4.75           | 0.0007 | 2662                       |
| 1750            | 4.72           | 0.0040 | 1700                       |
| 1786            | 4.61           | 0.0100 | 1104                       |
| 1853            | 4.54           | 0.0184 | 640                        |
| 1921            | 4.47           | 0.0180 | 461                        |
| 1989            | 4.37           | 0.0090 | 223                        |
| 2052            | 4.22           | 0.0043 | 256                        |

**Table S.2: The soot yield and induction time for each experiment of mixture 2, the baseline mixture.**

| Temperature (K) | Pressure (atm) | $SY_E$ | Induction Time ( $\mu s$ ) |
|-----------------|----------------|--------|----------------------------|
| 1726            | 4.72           | 0.0019 | 2044                       |
| 1760            | 4.66           | 0.0052 | 1543                       |
| 1793            | 4.56           | 0.0102 | 1345                       |
| 1828            | 4.45           | 0.0162 | 889                        |
| 1832            | 4.37           | 0.0165 | 861                        |
| 1892            | 4.32           | 0.0189 | 553                        |
| 1939            | 4.34           | 0.0160 | 387                        |
| 1927            | 4.16           | 0.0147 | 367                        |
| 1974            | 4.22           | 0.0118 | 334                        |
| 2016            | 4.06           | 0.0041 | 190                        |
| 2054            | 4.09           | 0.0044 | 156                        |
| 2016            | 4.31           | 0.0077 | 123                        |

**Table S.3: The soot yield and induction time for each experiment of mixture 3, methyl furan.**



## Mixture 4

| Temperature (K) | Pressure (atm) | SY <sub>E</sub> | Induction Time (μs) |
|-----------------|----------------|-----------------|---------------------|
| 1757            | 4.62           | 0.0031          | 1780                |
| 1798            | 4.50           | 0.0099          | 1406                |
| 1823            | 4.54           | 0.0172          | 997                 |
| 1843            | 4.58           | 0.0208          | 948                 |
| 1852            | 4.55           | 0.0235          | 868                 |
| 1872            | 4.47           | 0.0230          | 755                 |
| 1898            | 4.28           | 0.0231          | 590                 |
| 1953            | 4.40           | 0.0188          | 268                 |
| 1961            | 4.35           | 0.0164          | 238                 |
| 2003            | 4.28           | 0.0111          | 232                 |
| 2050            | 4.18           | 0.0066          | 223                 |
| 2107            | 4.12           | 0.0030          | 120                 |

**Table S.4: The soot yield and induction time for each experiment of mixture 4, Diisobutylene.**

| Temperature (K) | Pressure (atm) | SY <sub>E</sub> | Induction Time (μs) |
|-----------------|----------------|-----------------|---------------------|
| 1769            | 4.59           | 0.00288         | 1485                |
| 1770            | 4.49           | 0.0039          | 1477                |
| 1816            | 4.56           | 0.0081          | 1102                |
| 1834            | 4.63           | 0.0105          | 840                 |
| 1836            | 4.42           | 0.0102          | 793                 |
| 1890            | 4.34           | 0.0088          | 510                 |
| 1936            | 4.37           | 0.0065          | 438                 |
| 1978            | 4.37           | 0.0048          | 288                 |
| 1983            | 4.25           | 0.0037          | 265                 |
| 1988            | 4.20           | 0.0019          | 217                 |

**Table S.5: The soot yield and induction time for each experiment of mixture 5, ethanol.**

| Temperature (K) | Pressure (atm) | SY <sub>E</sub> | Induction Time (μs) |
|-----------------|----------------|-----------------|---------------------|
| 1776            | 4.53           | 0.0033          | 1748                |
| 1798            | 4.39           | 0.0045          | 1492                |
| 1847            | 4.36           | 0.0122          | 979                 |
| 1880            | 4.37           | 0.0149          | 724                 |
| 1926            | 4.39           | 0.0134          | 409                 |
| 1971            | 4.29           | 0.0089          | 380                 |
| 2024            | 4.64           | 0.0038          | 184                 |

**Table S.6: The soot yield and induction time for each experiment of mixture 6, cyclopentanone.**

| Temperature (K) | Pressure (atm) | SY <sub>E</sub> | Induction Time (μs) |
|-----------------|----------------|-----------------|---------------------|
| 1761            | 4.46           | 0.0012          | 1758                |
| 1808            | 4.42           | 0.0052          | 1277                |
| 1844            | 4.49           | 0.0150          | 1046                |
| 1878            | 4.47           | 0.0145          | 612                 |
| 1880            | 4.57           | 0.0156          | 593                 |
| 1919            | 4.43           | 0.0113          | 555                 |
| 1965            | 4.33           | 0.0077          | 294                 |
| 2005            | 4.29           | 0.0043          | 180                 |
| 2041            | 4.40           | 0.0026          | 101                 |

**Table S.7. The soot yield and induction time for each experiment of mixture 7, methyl acetate.**

## References

1. G. L. Agafonov *et al.*, Soot formation during the pyrolysis and oxidation of acetylene and ethylene in shock waves. *Kinetics and Catalysis* **56**, 12-30 (2015).
2. G. L. Agafonov *et al.*, Soot Formation During Pyrolysis of Methane and Rich Methane/Oxygen Mixtures Behind Reflected Shock Waves. *Combustion Science and Technology* **180**, 1876-1899 (2008).
3. Z. Hong, D. F. Davidson, S. S. Vasu, R. K. Hanson, The effect of oxygenates on soot formation in rich heptane mixtures: A shock tube study. *Fuel* **88**, 1901-1906 (2009).
4. U. Kc, M. Beshir, A. Farooq, Simultaneous measurements of acetylene and soot during the pyrolysis of ethylene and benzene in a shock tube. *Proceedings of the Combustion Institute* **36**, 833-840 (2017).
5. K. Johansson, M. Head-Gordon, P. Schrader, K. Wilson, H. J. S. Michelsen, Resonance-stabilized hydrocarbon-radical chain reactions may explain soot inception and growth. *361*, 997-1000 (2018).
6. S. Sinha, R. K. Rahman, A. J. P. C. C. P. Raj, On the role of resonantly stabilized radicals in polycyclic aromatic hydrocarbon (PAH) formation: pyrene and fluoranthene formation from benzyl–indenyl addition. **19**, 19262-19278 (2017).
